# Supplementary material for: A randomized controlled trial of intranasal oxytocin in Phelan-McDermid syndrome
Source: Springer Nature journal article supplement (doi:10.1186/s13229-021-00459-1), 2021-09-30

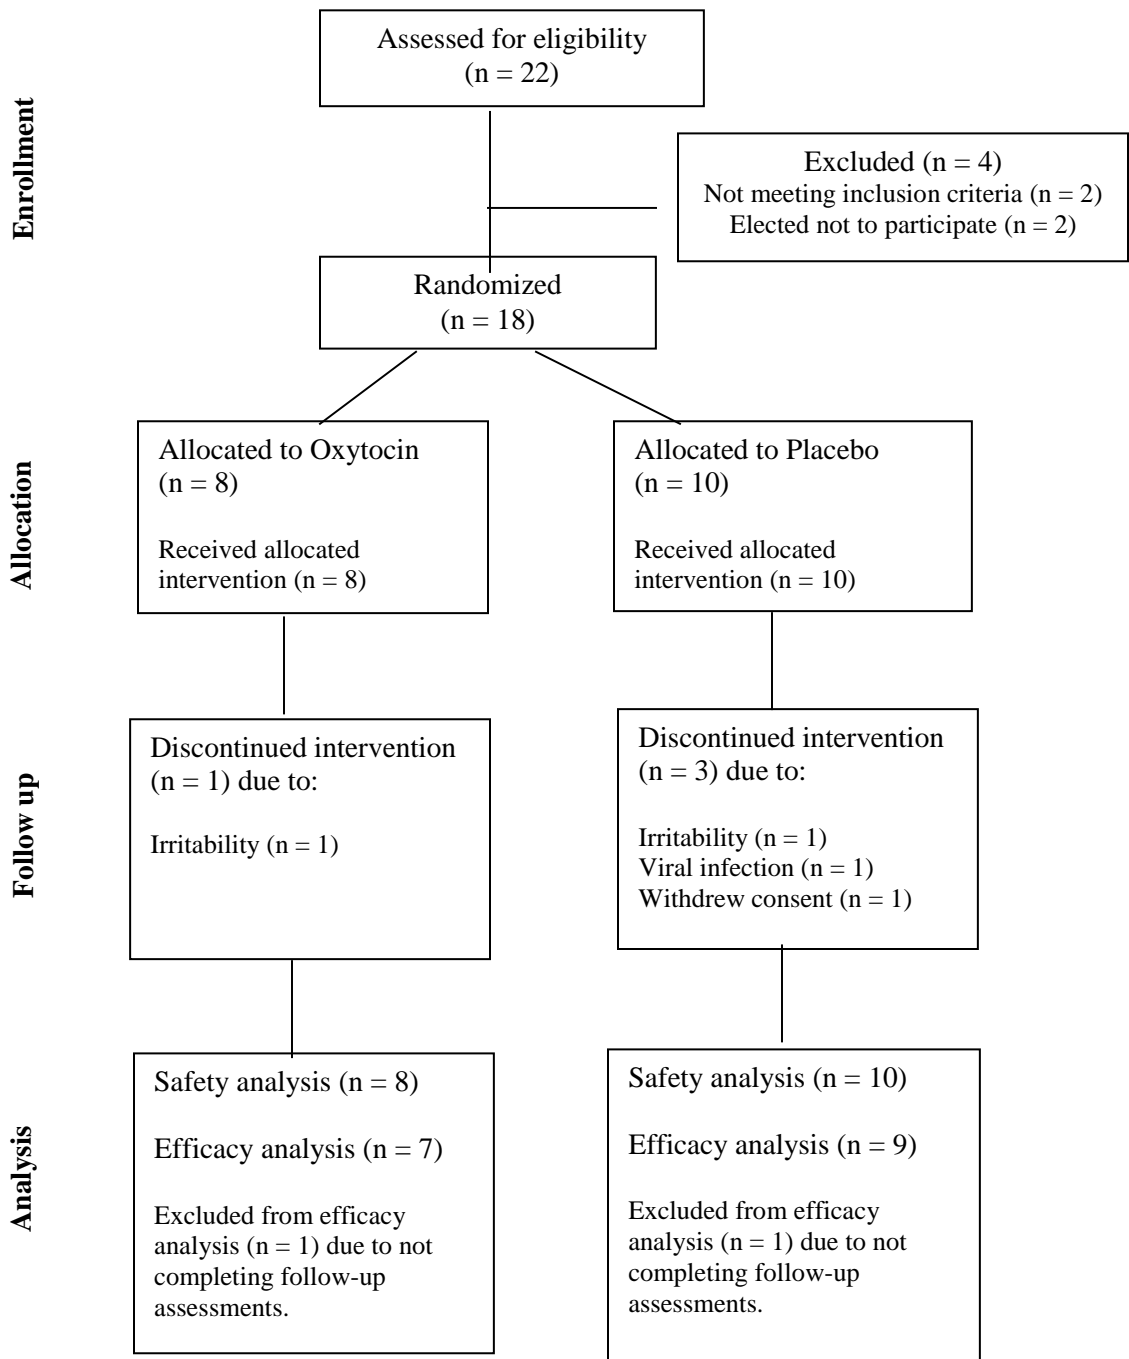

Supplement: MOESM2 [file 19716350]
